# Supplementary material for: Pectoral girdle and forelimb musculoskeletal function in the echidna (Tachyglossus aculeatus): insights into mammalian locomotor evolution
Source: R Soc Open Sci. 2018 Nov 14;5(11):181400. doi: 10.1098/rsos.181400 (PMC6281926; doi:10.1098/rsos.181400)
Supplement: Model MMA data [file rsos181400supp3.xlsx]

## Sheet: Glenohumeral ABAD
joint angle	biceps brevis	biceps longus	coracobrachialis brevis	coracobrachialis longus	clavodeltoideus	spinodeltoideus	acromiodeltoideus	infraspinatus part 1	infraspinatus part 2	infraspinatus part 3	latissiumus dorsi part 1	latissiumus dorsi part 2	latissiumus dorsi part 3	latissiumus dorsi part 4	pectoralis part 1	pectoralis part 2	pectoralis part 3	subscapularis part 1	subscapularis part 2	subscapularis part 3	subcoracoideus	supracoracoideus	supraspinatus	teres minor	teres major	triceps medialis	triceps laterialis + accessorius	triceps longus superficialis + profundus
-59	-16.7026	-18.8112	-11.2278	-19.1147	-3.32301	3.94608	2.5612	-4.3765	-4.4031	-4.425	-6.4137	-1.1178	6.82997	-4.7842	-8.55956	2.5982	8.1991	-8.604	-8.6629	-7.6689	-7.91531	-6.22991	-5.54745	-1.88853	-5.3692	0	0	11.4817
-57	-16.5793	-18.558	-11.7801	-19.1182	-3.35981	3.80094	2.68739	-4.2405	-4.2715	-4.2987	-6.1162	-1.1003	6.3902	-4.1554	-9.08597	1.7937	7.7976	-8.6014	-8.6244	-7.5843	-8.09655	-6.33941	-5.48625	-1.76636	-5.0408	0	0	11.877
-55	-16.4448	-18.2993	-12.2432	-19.0991	-3.39162	3.57673	2.79868	-4.1033	-4.139	-4.1719	-5.8107	-1.0725	5.95845	-3.5253	-9.56024	0.9774	7.3783	-8.5886	-8.5766	-7.4937	-8.2612	-6.43617	-5.4206	-1.61282	-4.7095	0	0	12.2669
-53	-16.2995	-18.0353	-12.6295	-19.0588	-3.41851	3.27322	2.89758	-3.9651	-4.0058	-4.0445	-5.4973	-1.0354	5.53465	-2.894	-9.98509	0.1547	6.9417	-8.5659	-8.5198	-7.3973	-8.40989	-6.5207	-5.3506	-1.44917	-4.3754	0	0	12.6512
-51	-16.1443	-17.7664	-12.9496	-18.9986	-3.4406	2.8024	2.98487	-3.8257	-3.8716	-3.9166	-5.1761	-0.9889	5.11909	-2.2618	-10.3635	-0.6691	6.4885	-8.5335	-8.4543	-7.2954	-8.54298	-6.59348	-5.27638	-1.27629	-4.0388	0	0	13.0297
-49	-15.9795	-17.4928	-13.213	-18.92	-3.45797	1.93496	3.0622	-3.6847	-3.7364	-3.788	-4.8477	-0.9336	4.71211	-1.6289	-10.6986	-1.4884	6.0195	-8.4917	-8.3803	-7.1881	-8.6604	-6.65499	-5.19806	-1.0958	-3.6998	0	0	13.4021
-47	-15.8057	-17.2147	-13.4276	-18.8239	-3.47074	2.74796	3.13052	-3.542	-3.5999	-3.6584	-4.5123	-0.8689	4.31489	-0.9954	-10.9935	-2.2979	5.5355	-8.4406	-8.2983	-7.0758	-8.76332	-6.70572	-5.11575	-0.91008	-3.3587	0	0	13.7683
-45	-15.6234	-16.9324	-13.6001	-18.7114	-3.479	3.08392	3.28401	-3.3962	-3.4611	-3.5278	-4.17	-0.7957	3.92796	-0.3616	-11.2512	-3.0927	5.0375	-8.3807	-8.2084	-6.9586	-8.85226	-6.74612	-5.02958	-0.74265	-3.0157	0	0	14.1279
-43	-15.4331	-16.646	-13.7362	-18.5836	-3.48286	3.30104	3.46316	-3.2486	-3.3208	-3.3953	-3.8207	-0.7149	3.55215	0.2724	-11.4745	-3.868	4.5265	-8.3119	-8.1109	-6.8367	-8.92934	-6.7765	-4.93964	-0.55813	-2.671	0	0	14.4807
-41	-15.2351	-16.3558	-13.8406	-18.4411	-3.48244	3.4592	3.64067	-3.098	-3.178	-3.2611	-3.4646	-0.6251	3.18829	0.9062	-11.6662	-4.6195	4.0037	-8.2348	-8.0061	-6.7102	-8.99866	-6.80111	-4.84604	-0.37731	-2.3248	0	0	14.8263
-39	-15.03	-16.062	-13.9172	-18.2849	-3.47784	3.58119	3.81644	-2.9439	-3.0323	-3.1246	-3.102	-0.5266	2.83722	1.5397	-11.8289	-5.3437	3.4702	-8.1493	-7.8943	-6.5795	-9.06237	-6.82323	-4.74891	-0.20197	-1.9772	0	0	15.1646
-37	-14.8181	-15.7647	-13.9693	-18.1156	-3.46917	3.67831	3.99037	-2.7859	-2.8832	-2.9852	-2.7329	-0.4193	2.49972	2.1728	-11.9647	-6.0375	2.9275	-8.0559	-7.7756	-6.4445	-9.12074	-6.84287	-4.64833	-0.03211	-1.6285	0	0	15.4952
-35	-14.5998	-15.4642	-13.9998	-17.9338	-3.45654	3.75706	4.16236	-2.6235	-2.7302	-2.8424	-2.3575	-0.3031	2.17655	2.8051	-12.0759	-6.6984	2.3768	-7.9547	-7.6504	-6.3056	-9.17228	-6.85839	-4.54442	0.12261	-1.2789	0	0	15.8178
-33	-14.3753	-15.1605	-14.0109	-17.7402	-3.44006	3.82149	4.33231	-2.4563	-2.5729	-2.6957	-1.9758	-0.178	1.86841	3.4365	-12.1644	-7.3247	1.8196	-7.8459	-7.5189	-6.1628	-9.21432	-6.87	-4.43728	0.27113	-0.9286	0	0	16.1321
-31	-14.1451	-14.8539	-14.0047	-17.5354	-3.41983	3.87434	4.50013	-2.2839	-2.4108	-2.5446	-1.5882	-0.044	1.57593	4.0668	-12.232	-7.915	1.2574	-7.7298	-7.3812	-6.0163	-9.23906	-6.87761	-4.32701	0.4156	-0.5778	0	0	16.4378
-29	-13.9094	-14.5444	-13.9829	-17.3198	-3.39597	3.91753	4.66569	-2.1061	-2.2435	-2.3886	-1.1947	0.0989	1.2997	4.6958	-12.2802	-8.4686	0.6917	-7.6066	-7.2377	-5.8663	-9.2418	-6.88128	-4.21371	0.55526	-0.2266	0	0	16.7344
-27	-13.6684	-14.2322	-13.9469	-17.0939	-3.36858	3.95242	4.8289	-1.9227	-2.0709	-2.2274	-0.7955	0.2509	1.04025	5.3232	-12.3105	-8.9853	0.1241	-7.4766	-7.0886	-5.7129	-9.22851	-6.88107	-4.09749	0.68674	0.1247	0	0	17.0217
-25	-13.4226	-13.9175	-13.8979	-16.8581	-3.33776	3.98009	4.98965	-1.7336	-1.8928	-2.0607	-0.3908	0.4118	0.79827	5.9489	-12.3241	-9.4652	-0.4438	-7.3399	-6.9341	-5.5562	-9.19916	-6.87712	-3.97845	0.8105	0.4759	0	0	17.2993
-23	-13.1721	-13.6003	-13.837	-16.613	-3.30363	4.00142	5.14782	-1.5389	-1.7092	-1.8882	0.0194	0.5818	0.57368	6.5727	-12.3224	-9.9087	-1.0105	-7.1968	-6.7742	-5.3964	-9.15408	-6.86955	-3.85668	0.92818	0.8269	0	0	17.5666
-21	-12.9171	-13.2809	-13.7651	-16.3588	-3.26627	4.20085	5.3033	-1.3388	-1.5201	-1.7101	0.4349	0.7609	0.36714	7.1943	-12.3062	-10.3166	-1.5744	-7.0474	-6.6094	-5.2336	-9.09349	-6.85851	-3.60115	1.03518	1.1774	0	0	17.8234
-19	-12.6579	-12.9592	-13.6831	-16.0959	-3.2258	4.46582	5.45598	-1.1334	-1.3257	-1.5263	0.8568	0.949	0.17897	7.8136	-12.2766	-10.6899	-2.134	-6.8921	-6.4398	-5.0679	-9.01792	-6.84414	-3.54113	1.14607	1.5272	0	0	18.0691
-17	-12.3947	-12.6354	-13.5915	-15.8247	-3.1823	4.72748	5.60572	-0.9231	-1.1263	-1.3369	1.2835	1.1461	0.00945	8.4303	-12.2345	-11.0297	-2.6877	-6.7309	-6.2657	-4.8995	-8.92732	-6.82658	-3.48521	1.23015	1.8762	0	0	18.3033
-15	-12.1278	-12.3097	-13.4911	-15.5454	-3.13589	4.98562	5.75241	-0.7083	-0.9221	-1.1424	1.7148	1.3523	-0.13362	9.0442	-12.1806	-11.3372	-3.2341	-6.5641	-6.0871	-4.7285	-8.82194	-6.80595	-3.43313	1.30536	2.2241	0	0	18.5254
-13	-11.8573	-11.982	-13.3823	-15.2585	-3.08665	5.24002	5.89593	-0.4892	-0.7137	-0.943	2.1506	1.5673	-0.25134	9.6552	-12.1156	-11.6139	-3.7718	-6.392	-5.9045	-4.5549	-8.70153	-6.78238	-3.38451	1.37233	2.5708	0	0	18.7349
-11	-11.5835	-11.6525	-13.2656	-14.9641	-3.03467	5.49045	6.03612	-0.2627	-0.5013	-0.7391	2.5906	1.7913	-0.34735	10.2629	-12.0402	-11.8609	-4.2994	-6.2147	-5.7181	-4.379	-8.56764	-6.75599	-3.33899	1.43168	2.9159	0	0	18.9311
-9	-11.3065	-11.3212	-13.1415	-14.6626	-2.98006	5.73669	6.17287	-0.022	-0.2729	-0.524	3.0347	2.0241	-0.42182	10.8674	-11.955	-12.0798	-4.8157	-6.0324	-5.5273	-4.2008	-8.42277	-6.72689	-3.26185	1.48398	3.2595	0	0	19.1135
-7	-11.0264	-10.9883	-13.0103	-14.3543	-2.9229	5.97852	6.30602	0.2201	-0.0362	-0.2882	3.4827	2.2657	-0.475	11.4682	-11.8605	-12.2719	-5.3195	-5.8451	-5.3286	-4.0205	-8.26353	-6.69518	-3.17624	1.52979	3.6011	0	0	19.2814
-5	-10.7435	-10.6539	-12.8723	-14.0393	-2.86328	6.21571	6.43543	0.4625	0.2011	-0.0511	3.9344	2.5158	-0.50718	12.0652	-11.7572	-12.4385	-5.8097	-5.6534	-5.126	-3.8381	-8.08832	-6.66096	-3.08749	1.57466	3.9407	0	0	19.4339
-3	-10.4579	-10.318	-12.7279	-13.736	-2.80128	6.44804	6.56095	0.7045	0.438	0.186	4.3896	2.7745	-0.53227	12.6583	-11.6456	-12.581	-6.2854	-5.4573	-4.9199	-3.6538	-7.89498	-6.62432	-2.99465	1.60408	4.278	0	0	19.5704
-1	-10.1698	-9.9808	-12.5773	-13.4996	-2.737	6.67527	6.68241	0.9453	0.6737	0.4219	4.8481	3.0415	-0.53575	13.2472	-11.526	-12.7006	-6.7456	-5.257	-4.7103	-3.4676	-7.68071	-6.58517	-2.89678	1.63232	4.6129	0	0	19.6899
1	-9.8793	-9.6422	-12.4208	-13.2594	-2.67053	6.89717	6.79964	1.1843	0.9076	0.656	5.3097	3.3168	-0.51252	13.8316	-11.3989	-12.7984	-7.1895	-5.0527	-4.4975	-3.2797	-7.44163	-6.54255	-2.79306	1.71302	4.945	0	0	19.7915
3	-9.5866	-9.3025	-12.2587	-13.0158	-2.60193	7.11351	6.91248	1.421	1.1391	0.8874	5.7741	3.6001	-0.46424	14.4115	-11.2645	-12.8757	-7.6165	-4.8445	-4.2816	-3.0902	-7.17244	-6.49886	-2.68289	1.79331	5.2743	0	0	19.8741
5	-9.2917	-8.9618	-12.091	-12.769	-2.5313	7.32404	7.02073	1.6549	1.3676	1.1155	6.2412	3.8912	-0.39242	14.9865	-11.1233	-12.9336	-8.0258	-4.6327	-4.0628	-2.8992	-6.86566	-6.45411	-2.56596	1.87315	5.6004	0	0	19.9368
7	-8.9949	-8.6201	-11.9181	-12.5192	-2.45872	7.52853	7.12421	1.8853	1.5926	1.34	6.7107	4.1901	-0.29792	15.5566	-10.9755	-12.973	-8.4171	-4.4175	-3.8413	-2.7067	-6.50899	-6.40738	-2.44231	1.95246	5.9232	0	0	19.9783
9	-8.6963	-8.2774	-11.7402	-12.2666	-2.38426	7.72673	7.22271	2.1116	1.8137	1.5602	7.1824	4.4964	-0.1815	16.1214	-10.8214	-12.9949	-8.7898	-4.199	-3.6172	-2.513	-6.08082	-6.35872	-2.31229	2.03107	6.2424	0	0	19.9972
11	-8.3959	-7.9554	-11.5573	-12.0115	-2.30801	7.9184	7.31602	2.3332	2.0304	1.7759	7.6561	4.81	-0.04385	16.6808	-10.6612	-13.0003	-9.1437	-3.9773	-3.3907	-2.318	-5.53848	-6.30818	-2.17529	2.10916	6.5579	0	0	19.9922
13	-8.0939	-7.7935	-11.3697	-11.754	-2.23004	8.10329	7.40391	2.5495	2.2422	1.9865	8.1316	5.1306	0.11436	17.2345	-10.4953	-12.99	-9.4784	-3.7528	-3.1619	-2.1219	-4.68254	-6.25584	-2.03418	2.18655	6.8694	0	0	19.9618
15	-7.7904	-7.636	-11.1775	-11.4944	-2.15043	8.28115	7.48615	2.7598	2.4484	2.1915	8.6085	5.4579	0.2925	17.7824	-10.3238	-12.9647	-9.7939	-3.5255	-2.9311	-1.9248	-4.04969	-6.20122	-1.88879	2.26317	7.1767	0	0	19.9042
17	-7.4856	-7.4896	-10.9808	-11.2327	-2.06924	8.45172	7.56248	2.9686	2.6484	2.3905	9.0868	5.7919	0.48994	18.3243	-10.147	-12.9253	-10.0899	-3.2957	-2.6983	-1.7268	-3.86888	-6.14378	-1.73986	2.33896	7.4796	0	0	19.8176
19	-7.1795	-7.3528	-10.7798	-10.9693	-1.98657	8.61475	7.63265	3.178	2.8423	2.5829	9.5661	6.132	0.70603	18.8599	-9.96498	-12.8725	-10.3665	-3.0635	-2.4638	-1.528	-3.73699	-6.08485	-1.58783	2.41385	7.7777	0	0	19.7001
21	-6.8722	-7.2246	-10.5747	-10.7041	-1.90248	8.76997	7.69635	3.3864	3.0355	2.768	10.0463	6.4783	0.94012	19.389	-9.77806	-12.8068	-10.6237	-2.8291	-2.2277	-1.3284	-3.63432	-6.02521	-1.43373	2.48777	8.071	0	0	19.5496
23	-6.6134	-7.1038	-10.3656	-10.4375	-1.81703	8.91713	7.75331	3.5936	3.2272	2.9479	10.527	6.8302	1.19158	19.9114	-9.58639	-12.729	-10.8616	-2.5927	-1.9902	-1.1282	-3.54857	-5.9641	-1.2778	2.56067	8.3591	0	0	19.3636
25	-6.5441	-6.9894	-10.1525	-10.1695	-1.73031	9.05596	7.80319	3.7995	3.4175	3.1261	11.008	7.1876	1.45971	20.4269	-9.39014	-12.6395	-11.0802	-2.3544	-1.7514	-0.9275	-3.47175	-5.90155	-1.12047	2.63257	8.6418	0	0	19.1398
27	-6.4781	-6.8784	-9.93558	-9.9003	-1.64239	9.1862	7.84566	4.004	3.6063	3.3024	11.4891	7.5502	1.74386	20.9353	-9.18949	-12.539	-11.2798	-2.1144	-1.5114	-0.7263	-3.40108	-5.83761	-0.9621	2.7031	8.9188	0	0	18.8755
29	-6.4153	-6.7746	-9.71501	-9.63	-1.55332	9.30756	7.88037	4.212	3.7951	3.4792	11.9701	7.9176	2.04331	21.4364	-8.98459	-12.4279	-11.4606	-1.8729	-1.2705	-0.5248	-3.33209	-5.77233	-0.80301	2.77251	9.19	0	0	18.5679
31	-6.3543	-6.6749	-9.49087	-9.3588	-1.4632	9.41978	7.90692	4.4219	3.9928	3.6651	12.4507	8.2896	2.35736	21.9299	-8.7756	-12.3067	-11.6228	-1.6301	-1.0288	-0.323	-3.26363	-5.70576	-0.64348	2.84061	9.4549	0	0	18.2139
33	-6.2947	-6.5788	-9.26327	-9.0868	-1.37207	9.52259	7.92491	4.6294	4.1876	3.8476	12.9306	8.6659	2.68529	22.4156	-8.56268	-12.1759	-11.7667	-1.3862	-0.7864	-0.1211	-3.16211	-5.63793	-0.48375	2.90734	9.7135	0	0	17.8105
35	-6.2364	-6.4856	-9.03232	-8.8142	-1.28001	9.61571	7.93392	4.8337	4.3793	4.0265	13.4097	9.0462	3.02635	22.8933	-8.34597	-12.0358	-11.8926	-1.1412	-0.5435	0.0808	-3.03881	-5.56889	-0.2983	2.97263	9.9653	0	0	17.3543
37	-6.1788	-6.3949	-8.79813	-8.5409	-1.18709	9.69887	7.93346	5.0346	4.5675	4.2017	13.8877	9.4301	3.3798	23.3626	-8.12561	-11.8869	-12.0008	-0.8954	-0.3003	0.2828	-2.90604	-5.49867	-0.10263	3.03641	10.2101	0	0	16.8422
39	-6.1218	-6.3063	-8.5608	-8.3143	-1.09337	9.77178	7.92307	5.2317	4.7522	4.3729	14.3643	9.8173	3.74486	23.8235	-7.90174	-11.7296	-12.0917	-0.6489	-0.0569	0.4846	-2.76314	-5.42731	0.09523	3.09859	10.4476	0	0	16.2709
41	-6.0651	-6.2194	-8.32043	-8.2052	-0.99892	9.83416	7.90222	5.4245	4.9331	4.5522	14.8394	10.2076	4.12076	24.2756	-7.6745	-11.5641	-12.1656	-0.402	0.1865	0.6861	-2.60844	-5.35483	0.29116	3.15893	10.6776	0	0	15.637
43	-6.0085	-6.1339	-8.07713	-8.0868	-0.90381	9.88575	7.87037	5.6125	5.1099	4.7218	15.3127	10.6005	4.5067	24.7187	-7.444	-11.3909	-12.223	-0.1548	0.4298	0.8874	-2.44141	-5.28128	0.48364	3.21769	10.8997	0	0	14.9377
45	-5.9517	-6.0492	-7.87082	-7.9756	-0.8081	9.92625	7.82692	5.7958	5.2825	4.8861	15.7839	10.9959	4.90188	25.1524	-7.21039	-11.2102	-12.2641	0.0926	0.6729	1.0882	-2.26119	-5.20668	0.67313	3.27463	11.1136	0	0	14.1704
47	-5.8948	-5.9655	-7.78799	-7.8707	-0.71186	9.9554	7.77128	5.9733	5.4505	5.0449	16.2529	11.3957	5.30548	25.5766	-6.97379	-11.0223	-12.2894	0.34	0.9155	1.2885	-2.06745	-5.13106	0.85925	3.32967	11.319	0	0	13.3327
49	-5.8374	-5.8825	-7.70809	-7.7749	-0.61515	9.97293	7.70279	6.1446	5.6137	5.1981	16.7814	11.7974	5.71665	25.9908	-6.73431	-10.8276	-12.2992	0.5872	1.1576	1.4882	-1.85985	-5.05443	1.04157	3.38273	11.5156	0	0	12.4234
51	-5.7796	-5.7998	-7.63082	-7.6802	-0.51804	9.97855	7.62079	6.3094	5.772	5.3456	17.3301	12.1998	6.13456	26.3949	-6.49209	-10.6263	-12.294	0.834	1.3989	1.6872	-1.46811	-4.97683	1.21962	3.43373	11.703	0	0	11.442
53	-5.7211	-5.7174	-7.55587	-7.5898	-0.42058	9.972	7.52458	6.4671	5.9249	5.4873	17.8732	12.5989	6.55908	26.7885	-6.24723	-10.4187	-12.2742	1.0802	1.6393	1.8854	-1.08402	-4.89826	1.39342	3.48258	11.8808	0	0	10.3889
55	-5.6621	-5.635	-7.48295	-7.5031	-0.32286	9.95302	7.41344	6.6174	6.0723	5.623	18.4103	12.9989	6.98903	27.1711	-5.99986	-10.205	-12.2401	1.3258	1.8786	2.0827	-0.72698	-4.81877	1.56264	3.5292	12.0488	0	0	9.2661
57	-5.6023	-5.5525	-7.41178	-7.4196	-0.22492	9.92137	7.28663	6.7599	6.2138	5.7526	18.9413	13.3992	7.42135	27.5425	-5.75009	-9.9854	-12.1921	1.5705	2.1168	2.279	-0.40328	-4.73835	1.72711	3.57351	12.2065	0	0	8.0772
59	-5.5417	-5.4697	-7.34212	-7.3388	-0.12683	9.87678	7.1434	6.8942	6.3492	5.8759	19.4661	13.7997	7.85006	27.9023	-5.49803	-9.7603	-12.1307	1.8141	2.3536	2.4742	-0.10895	-4.65703	1.88666	3.6154	12.3536	0	0	6.8271

## Sheet: Glenohumeral FE
Joint angle	biceps brevis	biceps longus	coracobrachialis brevis	coracobrachialis longus	clavodeltoideus	spinodeltoideus	acromiodeltoideus	infraspinatus part 1	infraspinatus part 2	infraspinatus part 3	latissiumus dorsi part 1	latissiumus dorsi part 2	latissiumus dorsi part 3	latissiumus dorsi part 4	pectoralis part 1	pectoralis part 2	pectoralis part 3	subscapularis part 1	subscapularis part 2	subscapularis part 3	subcoracoideus	supracoracoideus	supraspinatus	teres minor	teres major	triceps medialis	triceps laterialis + accessorius	triceps longus superficialis + profundus
-13	-6.51129	-6.94118	4.96195	5.0363	-6.94326	1.61148	1.40519	2.39365	2.13453	1.87008	14.992	23.9287	30.5154	13.1233	-10.6464	-11.7445	-5.2368	1.72651	0.90178	-0.25344	8.95229	-1.42348	0.010371	-2.91976	8.72558	0	0	5.121
-12	-6.41013	-7.00775	5.05751	5.21742	-7.17811	1.61849	1.31544	2.37257	2.10952	1.84435	15.1532	24.0798	30.6234	13.1397	-10.7709	-11.7186	-5.19625	1.61368	0.83082	-0.3183	9.16323	-1.61022	-0.002976	-2.9386	8.66018	0	0	5.014
-11	-6.30745	-7.06662	5.15262	5.39803	-7.40492	1.62502	1.225	2.35031	2.08345	1.81779	15.3112	24.2248	30.7231	13.1522	-10.8888	-11.6899	-5.15441	1.49997	0.75954	-0.38303	9.3512	-1.79035	-0.016998	-2.95697	8.59161	0	0	4.90473
-10	-6.20327	-7.11773	5.24729	5.57809	-7.62369	1.63106	1.13392	2.32687	2.05633	1.79042	15.4657	24.3634	30.8138	13.1609	-11.0003	-11.6585	-5.1113	1.38544	0.68795	-0.44759	9.52395	-1.96392	-0.031711	-2.97482	8.51986	0	0	4.79322
-9	-6.0976	-7.16109	5.3415	5.7576	-7.83444	1.63661	1.04224	2.30224	2.02814	1.76224	15.6166	24.4955	30.8953	13.1655	-11.1055	-11.6245	-5.06693	1.27015	0.6161	-0.51195	9.67748	-2.13097	-0.047131	-2.99211	8.44494	0	0	4.6795
-8	-5.99046	-7.19677	5.43524	5.93654	-8.03723	1.64167	0.95	2.27643	1.99891	1.73325	15.7639	24.6207	30.9673	13.1662	-11.2045	-11.588	-5.02132	1.15416	0.544	-0.5761	9.81628	-2.2916	-0.061386	-3.00868	8.36685	0	0	4.56361
-7	-5.88187	-7.23198	5.52851	6.11487	-8.23213	1.64624	0.85726	2.24944	1.96862	1.70348	15.9075	24.7389	31.0289	13.1629	-11.2975	-11.5489	-4.97449	1.03754	0.47169	-0.64	9.94798	-2.44587	-0.078539	-3.02452	8.28559	0	0	4.44558
-6	-5.77183	-7.14234	5.62128	6.2926	-8.41919	1.65032	0.76406	2.22126	1.93729	1.67291	16.0473	24.8499	31.0806	13.1555	-11.3846	-11.5075	-4.92647	0.92035	0.39919	-0.70362	10.0737	-2.59388	-0.096423	-3.03948	8.20117	0	0	4.32547
-5	-5.66039	-7.02718	5.71356	6.46969	-8.59853	1.6539	0.67045	2.19189	1.90493	1.64157	16.1831	24.9533	31.1221	13.144	-11.466	-11.4637	-4.87726	0.80265	0.32653	-0.76695	10.1942	-2.73573	-0.115046	-3.05342	8.11358	0	0	4.2033
-4	-5.54755	-6.90992	5.80533	6.64613	-8.77024	1.65697	0.57648	2.16134	1.87152	1.60946	16.3149	25.049	31.1528	13.1284	-11.5417	-11.4176	-4.82689	0.68452	0.25374	-0.82995	10.3101	-2.87151	-0.134413	-3.06616	8.02285	0	0	4.07913
-3	-5.43334	-6.79059	5.89659	6.82189	-8.93443	1.65955	0.4822	2.1296	1.83709	1.5766	16.4424	25.1367	31.1723	13.1086	-11.612	-11.3693	-4.77538	0.56602	0.18085	-0.89259	10.4219	-3.00135	-0.154529	-3.07971	7.92897	0	0	3.953
-2	-5.31775	-6.66921	5.98732	6.98295	-9.09124	1.66163	0.38767	2.09667	1.80164	1.543	16.5658	25.216	31.1803	13.0846	-11.6768	-11.3188	-4.72274	0.44721	0.10789	-0.95485	10.53	-3.12535	-0.175396	-3.09258	7.83196	0	0	3.82496
-1	-5.20082	-6.5458	6.07752	7.13875	-9.24079	1.6632	0.29292	2.06257	1.76517	1.50866	16.6847	25.2867	31.1762	13.0563	-11.7365	-11.2662	-4.66899	0.32817	0.03489	-1.01671	10.6347	-3.2436	-0.197013	-3.10449	7.73184	0	0	3.69507
0	-5.08256	-6.42039	6.16718	7.29293	-9.38321	1.66427	0.19802	2.02728	1.7277	1.4736	16.7991	25.3486	31.1595	13.0238	-11.791	-11.2115	-4.61416	0.20896	-0.03812	-1.07814	10.7363	-3.35512	-0.21938	-3.11532	7.62862	0	0	3.56336
1	-4.96299	-6.29299	6.25628	7.44546	-9.51866	1.66484	0.10301	1.99081	1.68923	1.43784	16.9089	25.4012	31.1305	12.987	-11.8406	-11.1548	-4.55826	0.08965	-0.11112	-1.13911	10.8349	-3.46083	-0.242492	-3.12722	7.52232	0	0	3.4299
2	-4.8421	-6.16363	6.34481	7.59632	-9.64728	1.66489	0.00795	1.95316	1.64978	1.40139	17.0139	25.4442	31.0883	12.9458	-11.8853	-11.0961	-4.50131	-0.02968	-0.18408	-1.1996	10.9307	-3.56298	-0.266345	-3.13733	7.41295	0	0	3.29475
3	-4.71995	-6.03236	6.43278	7.74549	-9.76921	1.66444	-0.08712	1.91435	1.60935	1.36427	17.1139	25.4773	31.0324	12.9002	-11.9253	-11.0355	-4.44332	-0.149	-0.26277	-1.25958	11.024	-3.66025	-0.290931	-3.14698	7.30053	0	0	3.15795
4	-4.59654	-5.8992	6.52016	7.89293	-9.88461	1.66348	-0.18214	1.87436	1.56797	1.32648	17.209	25.5002	30.9624	12.8503	-11.9607	-10.973	-4.38433	-0.26818	-0.35101	-1.31904	11.1148	-3.75234	-0.316241	-3.15944	7.1851	0	0	3.01958
5	-4.47189	-5.76415	6.60694	8.03863	-9.99362	1.66202	-0.27707	1.83321	1.52563	1.28806	17.2988	25.5124	30.8776	12.7959	-11.9915	-10.9087	-4.32434	-0.38718	-0.43904	-1.37795	11.2032	-3.83936	-0.342265	-3.16822	7.06668	0	0	2.87969
6	-4.346	-5.62724	6.69313	8.18256	-10.0964	1.66004	-0.37184	1.7909	1.48235	1.24901	17.3833	25.5135	30.7777	12.7371	-12.018	-10.8426	-4.26337	-0.50593	-0.52699	-1.43627	11.2894	-3.92141	-0.368988	-3.17477	6.94528	0	0	2.73835
7	-4.21891	-5.48847	6.7787	8.32469	-10.1931	1.65755	-0.46642	1.74744	1.43816	1.20935	17.4623	25.5032	30.6619	12.6738	-12.0401	-10.7747	-4.20144	-0.62434	-0.61482	-1.49401	11.3733	-3.9986	-0.396397	-3.22534	6.82095	0	0	2.59562
8	-4.09062	-5.34787	6.86365	8.465	-10.2839	1.65456	-0.56074	1.70283	1.39305	1.16911	17.5356	25.4809	30.5299	12.6059	-12.0581	-10.7051	-4.13858	-0.74236	-0.70257	-1.55112	11.4552	-4.07105	-0.424476	-3.25184	6.69371	0	0	2.45157
9	-3.96115	-5.20546	6.94796	8.60346	-10.369	1.65106	-0.65476	1.65708	1.34706	1.12831	17.6031	25.4462	30.3808	12.5336	-12.072	-10.6338	-4.0748	-0.85992	-0.79022	-1.60759	11.535	-4.13886	-0.453205	-3.2775	6.5636	0	0	2.30626
10	-3.83052	-5.06128	7.03163	8.74003	-10.4484	1.64704	-0.74844	1.6102	1.3002	1.08696	17.6647	25.3987	30.2142	12.4567	-12.0819	-10.5609	-4.01011	-0.97694	-0.87773	-1.66339	11.6128	-4.20215	-0.482566	-3.30179	6.43065	0	0	2.15977
11	-3.69875	-4.91535	7.11464	8.87471	-10.5223	1.64252	-0.84171	1.5622	1.25249	1.04509	17.72	25.3378	30.0292	12.3752	-12.088	-10.4864	-3.94454	-1.09336	-0.96505	-1.71852	11.6886	-4.26012	-0.512537	-3.32451	6.2949	0	0	2.01217
12	-3.56587	-4.76767	7.19699	9.00745	-10.5909	1.63749	-0.93453	1.51309	1.20395	1.00273	17.769	25.263	29.8251	12.2892	-12.0902	-10.4103	-3.8781	-1.2091	-1.05214	-1.77294	11.7624	-4.31329	-0.543094	-3.34574	6.15639	0	0	1.86353
13	-3.43188	-4.61832	7.27867	9.13822	-10.6543	1.63196	-1.02685	1.46287	1.15459	0.959887	17.8114	25.1737	29.6012	12.1985	-12.0888	-10.3326	-3.81082	-1.32411	-1.13898	-1.82663	11.8343	-4.36321	-0.574213	-3.36568	6.01517	0	0	1.71392

## Sheet: Glenohumeral LAR
Joint angle	biceps brevis	biceps longus	coracobrachialis brevis	coracobrachialis longus	clavodeltoideus	spinodeltoideus	acromiodeltoideus	infraspinatus part 1	infraspinatus part 2	infraspinatus part 3	latissiumus dorsi part 1	latissiumus dorsi part 2	latissiumus dorsi part 3	latissiumus dorsi part 4	pectoralis part 1	pectoralis part 2	pectoralis part 3	subscapularis part 1	subscapularis part 2	subscapularis part 3	subcoracoideus	supracoracoideus	supraspinatus	teres minor	teres major	triceps medialis	triceps laterialis + accessorius	triceps longus superficialis + profundus
-27	-0.51053	-2.88856	1.41534	2.74886	-1.41817	-9.00084	-8.01898	-12.6857	-12.4721	-12.1392	12.2448	18.715	23.5546	13.8123	-0.7236	10.7378	16.6044	11.8977	10.3555	8.6237	2.77946	-4.30162	-11.0407	2.80946	14.7032	0	0	8.11448
-26	-0.56462	-2.95125	1.25834	2.52584	-1.77123	-8.90267	-7.99881	-12.6171	-12.3988	-12.0633	12.4061	18.8342	23.5862	14.0307	-1.0257	10.6594	16.6451	12.0462	10.5062	8.75304	2.70601	-4.42877	-10.9754	2.87631	14.8616	0	0	8.13414
-25	-0.61855	-3.01268	1.10046	2.29968	-2.12141	-8.80268	-7.9767	-12.5473	-12.3241	-11.9867	12.5639	18.9481	23.6091	14.2469	-1.3267	10.5762	16.6815	12.1925	10.6557	8.88159	2.63272	-4.55247	-10.9092	2.94278	15.0175	0	0	8.15153
-24	-0.67229	-3.07283	0.94181	2.07921	-2.46818	-8.70088	-7.95269	-12.4767	-12.2485	-11.9095	12.7182	19.0563	23.623	14.4609	-1.6263	10.488	16.7134	12.3364	10.8039	9.00935	2.55968	-4.67266	-10.842	3.00798	15.1707	0	0	8.1666
-23	-0.72583	-3.13167	0.7825	1.86622	-2.81102	-8.59733	-7.92684	-12.4043	-12.172	-11.8318	12.869	19.1589	23.6279	14.6726	-1.9242	10.3947	16.7407	12.4781	10.9507	9.1363	2.48696	-4.78925	-10.7739	3.07577	15.3214	0	0	8.17933
-22	-0.77914	-3.18919	0.62263	1.71386	-3.14945	-8.49204	-7.89918	-12.3309	-12.0947	-11.7536	13.0161	19.2556	23.6236	14.8819	-2.2201	10.2964	16.7635	12.6174	11.0961	9.26243	2.41468	-4.9022	-10.7049	3.14636	15.4693	0	0	8.18969
-21	-0.8322	-3.24536	0.46232	1.56125	-3.48301	-8.38505	-7.86977	-12.2565	-12.0166	-11.6748	13.1595	19.3464	23.6098	15.0888	-2.5137	10.1929	16.7815	12.7542	11.2401	9.38772	2.3429	-5.01147	-10.635	3.22062	15.6145	0	0	8.19765
-20	-0.88498	-3.30016	0.30169	1.40853	-3.81125	-8.2764	-7.83863	-12.1811	-11.9378	-11.5956	13.2991	19.431	23.5864	15.2934	-2.8047	10.0842	16.7947	12.8886	11.3827	9.51216	2.27171	-5.11702	-10.5641	3.29513	15.7568	0	0	8.20319
-19	-0.93746	-3.35357	0.14084	1.25582	-4.13378	-8.16611	-7.8058	-12.1047	-11.8583	-11.5159	13.4349	19.5094	23.5502	15.4954	-3.0929	9.9701	16.803	13.0204	11.5238	9.63574	2.20118	-5.21881	-10.4923	3.3737	15.8963	0	0	8.20628
-18	-0.98961	-3.40557	-0.02011	1.10327	-4.45022	-8.05423	-7.77134	-12.0274	-11.7781	-11.4357	13.5666	19.5813	23.5044	15.6948	-3.3779	9.8507	16.8063	13.1496	11.6633	9.75844	2.13137	-5.31684	-10.4196	3.45035	16.0329	0	0	8.20688
-17	-1.04142	-3.45615	-0.18104	0.951	-4.76025	-7.94077	-7.73526	-11.9492	-11.6972	-11.3552	13.6943	19.6468	23.4487	15.8917	-3.6596	9.7259	16.8044	13.2763	11.8013	9.88024	2.06239	-5.41109	-10.3459	3.52582	16.1665	0	0	8.20499
-16	-1.09285	-3.50529	-0.34185	0.79915	-5.06354	-7.82578	-7.69762	-11.8702	-11.6158	-11.2743	13.8179	19.7055	23.3829	16.086	-3.9376	9.5957	16.7974	13.4003	11.9376	10.0011	1.99431	-5.50156	-10.2713	3.60018	16.297	0	0	8.20055
-15	-1.14389	-3.55298	-0.50241	0.64785	-5.35984	-7.70929	-7.65844	-11.7902	-11.5337	-11.193	13.9373	19.7574	23.307	16.2775	-4.2118	9.4599	16.7851	13.5216	12.0723	10.1211	1.92717	-5.58826	-10.1956	3.67353	16.4245	0	0	8.19356
-14	-1.19451	-3.5992	-0.66262	0.49722	-5.64891	-7.59132	-7.61775	-11.7095	-11.451	-11.1114	14.0524	19.8024	23.2207	16.4662	-4.482	9.3185	16.7674	13.6401	12.2054	10.2401	1.86109	-5.67118	-10.1189	3.74598	16.5487	0	0	8.18398
-13	-1.24469	-3.64393	-0.82236	0.34739	-5.93054	-7.47191	-7.5756	-11.628	-11.3678	-11.0295	14.1632	19.8402	23.1241	16.6522	-4.7479	9.1716	16.7441	13.7558	12.3368	10.3582	1.79612	-5.75037	-10.0412	3.81762	16.6698	0	0	8.17178
-12	-1.29441	-3.68718	-0.98152	0.19848	-6.20455	-7.35108	-7.53201	-11.5457	-11.2841	-10.9472	14.2695	19.8708	23.0169	16.8353	-5.0093	9.019	16.7152	13.8687	12.4664	10.4753	1.73231	-5.82582	-9.96238	3.88857	16.7876	0	0	8.15695
-11	-1.34365	-3.72892	-1.13999	0.05063	-6.47082	-7.22888	-7.48701	-11.4627	-11.1999	-10.8647	14.3714	19.894	22.8991	17.0154	-5.266	8.8607	16.6806	13.979	12.5942	10.5915	1.66975	-5.89759	-9.88241	3.95893	16.902	0	0	8.13946
-10	-1.39239	-3.76915	-1.29766	-0.09607	-6.72921	-7.10533	-7.44064	-11.379	-11.1152	-10.7819	14.4687	19.9096	22.7706	17.1926	-5.518	8.6967	16.6401	14.0859	12.7211	10.7066	1.60853	-5.96569	-9.80108	4.02882	17.013	0	0	8.11928
-9	-1.4406	-3.80787	-1.45442	-0.24148	-6.97966	-6.98045	-7.39292	-11.2946	-11.0301	-10.6989	14.5613	19.9175	22.6313	17.3667	-5.765	8.5271	16.5937	14.1897	12.8462	10.8207	1.54868	-6.03017	-9.71866	4.09837	17.1205	0	0	8.09639
-8	-1.48826	-3.84505	-1.61017	-0.3855	-7.2221	-6.85429	-7.34387	-11.2096	-10.9446	-10.6157	14.6493	19.9176	22.481	17.5377	-6.0069	8.3517	16.5412	14.2904	12.9693	10.9338	1.49034	-6.09106	-9.63493	4.16774	17.2245	0	0	8.07076
-7	-1.53536	-3.8807	-1.76481	-0.52802	-7.4565	-6.72686	-7.29354	-11.1239	-10.8588	-10.5323	14.7324	19.9097	22.3198	17.7055	-6.2436	8.1705	16.4825	14.3881	13.0903	11.0458	1.43347	-6.14842	-9.54982	4.24482	17.3249	0	0	8.04238
-6	-1.58187	-3.91481	-1.91823	-0.66893	-7.68285	-6.59821	-7.24195	-11.0377	-10.7726	-10.4488	14.8108	19.8936	22.1476	17.8701	-6.475	7.9837	16.4175	14.4825	13.2093	11.1568	1.37823	-6.20229	-9.46324	4.3138	17.4215	0	0	8.01121
-5	-1.62778	-3.94738	-2.07034	-0.80813	-7.90116	-6.46835	-7.18911	-10.9509	-10.686	-10.365	14.8842	19.8694	21.9645	18.0315	-6.7009	7.7911	16.3461	14.5738	13.3261	11.2666	1.32465	-6.25273	-9.37511	4.38211	17.5144	0	0	7.97725
-4	-1.67307	-3.9784	-2.22103	-0.94553	-8.11146	-6.33732	-7.13506	-10.8635	-10.5992	-10.2811	14.9526	19.8367	21.77	18.1894	-6.9213	7.5929	16.2682	14.6618	13.4408	11.3754	1.27283	-6.29978	-9.28533	4.45826	17.6035	0	0	7.94046
-3	-1.71771	-4.00787	-2.37022	-1.08103	-8.31381	-6.20515	-7.07983	-10.7757	-10.512	-10.1971	15.0161	19.7955	21.5637	18.3439	-7.1361	7.389	16.1836	14.7464	13.5533	11.4831	1.22281	-6.3435	-9.19379	4.51352	17.6886	0	0	7.90084
-2	-1.76169	-4.03578	-2.51782	-1.21454	-8.50826	-6.07186	-7.02343	-10.6873	-10.4246	-10.1129	15.0744	19.7457	21.3458	18.4949	-7.3453	7.1795	16.0923	14.8276	13.6636	11.5896	1.17462	-6.38394	-9.10039	4.66947	17.7697	0	0	7.85835
-1	-1.805	-4.06215	-2.66374	-1.34599	-8.6949	-5.93749	-6.96589	-10.5985	-10.337	-10.0287	15.1276	19.6871	21.1164	18.6424	-7.5488	6.9644	15.994	14.9054	13.7715	11.695	1.12838	-6.42102	-9.00499	4.89467	17.8468	0	0	7.81299
0	-1.84762	-4.08696	-2.80789	-1.45098	-8.87383	-5.80206	-6.90724	-10.5093	-10.2491	-9.94432	15.1756	19.6196	20.8755	18.7862	-7.7465	6.7439	15.8888	14.9796	13.8772	11.7991	1.08421	-6.45437	-8.90748	5.12225	17.9197	0	0	7.76473
1	-1.88952	-4.11022	-2.9502	-1.55231	-9.04514	-5.66561	-6.84749	-10.4197	-10.1611	-9.85986	15.2183	19.5432	20.6233	18.9264	-7.9385	6.5179	15.7765	15.0503	13.9804	11.9022	1.04208	-6.48458	-8.80772	5.34593	17.9884	0	0	7.71356
2	-1.93069	-4.13192	-3.09059	-1.65298	-9.20894	-5.52815	-6.78667	-10.3296	-10.0729	-9.77531	15.2557	19.4576	20.3599	19.0627	-8.1246	6.2866	15.6569	15.1173	14.0812	12.0039	1.00212	-6.51185	-8.70556	5.56183	18.0528	0	0	7.65946
3	-1.97113	-4.15208	-3.22897	-1.75296	-9.36537	-5.38972	-6.7248	-10.2393	-9.98444	-9.69069	15.2878	19.3628	20.0853	19.1953	-8.305	6.0501	15.53	15.1807	14.1795	12.1045	0.96439	-6.5372	-8.60087	5.76832	18.1128	0	0	7.60243
4	-2.01081	-4.17069	-3.36529	-1.85219	-9.51455	-5.25035	-6.6619	-10.1485	-9.89587	-9.60598	15.3144	19.2587	19.7997	19.3239	-8.4796	5.8085	15.3956	15.2403	14.2752	12.2038	0.92899	-6.55966	-8.49352	5.96517	18.1682	0	0	7.54245
5	-2.04971	-4.18776	-3.49947	-1.95064	-9.65662	-5.11006	-6.59799	-10.0575	-9.80715	-9.52119	15.3356	19.1452	19.5032	19.4485	-8.6483	5.5618	15.2536	15.296	14.3684	12.3018	0.89598	-6.57932	-8.38337	6.15279	18.2191	0	0	7.4795
6	-2.08783	-4.2033	-3.63146	-2.04828	-9.79171	-4.96889	-6.5331	-9.96613	-9.7183	-9.43633	15.3513	19.0223	19.196	19.569	-8.8113	5.3103	15.104	15.3479	14.4589	12.3985	0.86541	-6.59621	-8.27034	6.33189	18.2654	0	0	7.41358
7	-2.12515	-4.21731	-3.76119	-2.14505	-9.91997	-4.82685	-6.46723	-9.8745	-9.62931	-9.35138	15.3614	18.8898	18.8781	19.6853	-8.9685	5.0541	14.9466	15.3959	14.5467	12.4939	0.8375	-6.6104	-8.15229	6.50258	18.3068	0	0	7.34469
8	-2.16166	-4.2298	-3.8886	-2.24093	-10.0416	-4.68398	-6.40041	-9.78259	-9.54019	-9.26634	15.366	18.7477	18.5497	19.7975	-9.12	4.7933	14.7813	15.4398	14.6317	12.588	0.81216	-6.62196	-8.03289	6.65675	18.3434	0	0	7.2728
9	-2.19735	-4.24077	-4.01365	-2.33588	-10.1566	-4.54031	-6.33267	-9.69129	-9.45094	-9.18121	15.3649	18.596	18.211	19.9053	-9.2659	4.5282	14.608	15.4796	14.7139	12.6807	0.78955	-6.63093	-7.95323	6.80438	18.3751	0	0	7.19793
10	-2.2322	-4.25022	-4.13628	-2.42985	-10.2652	-4.39585	-6.26401	-9.59891	-9.36157	-9.09597	15.3582	18.4346	17.8621	20.0087	-9.406	4.2588	14.4266	15.5153	14.7932	12.772	0.76985	-6.63738	-7.88482	6.94621	18.4017	0	0	7.12006
11	-2.2662	-4.25817	-4.25644	-2.52282	-10.3677	-4.25064	-6.19446	-9.50628	-9.27206	-9.01061	15.3458	18.2635	17.5032	20.1077	-9.5406	3.9855	14.237	15.5468	14.8696	12.8619	0.75306	-6.64136	-7.8159	7.08287	18.4231	0	0	7.0392
12	-2.29934	-4.26462	-4.37411	-2.61474	-10.464	-4.10471	-6.12403	-9.41341	-9.18242	-8.92513	15.3277	18.0827	17.1346	20.2021	-9.6696	3.7084	14.0392	15.574	14.9429	12.9503	0.73959	-6.64293	-7.74644	7.21486	18.4393	0	0	6.95533
13	-2.33161	-4.26957	-4.48923	-2.70559	-10.5544	-3.95808	-6.05274	-9.32029	-9.09262	-8.83949	15.3039	17.8921	16.7565	20.2918	-9.793	3.4277	13.8331	15.5968	15.0132	13.0373	0.72939	-6.64096	-7.6764	7.34261	18.4502	0	0	6.86848
14	-2.36301	-4.27305	-4.60177	-2.79533	-10.639	-3.81078	-5.98061	-9.22692	-9.00265	-8.7537	15.2743	17.6918	16.369	20.3768	-9.9111	3.1438	13.6186	15.6152	15.0803	13.1228	0.72259	-6.63625	-7.60574	7.46651	18.4555	0	0	6.77863
15	-2.39352	-4.27505	-4.7117	-2.88393	-10.718	-3.66284	-5.90766	-9.1333	-8.91251	-8.66772	15.2389	17.4818	15.9725	20.4569	-10.0238	2.8567	13.3956	15.6292	15.1442	13.2067	0.71935	-6.62932	-7.53444	7.58685	18.4553	0	0	6.68581
16	-2.42313	-4.27558	-4.81899	-2.97135	-10.7914	-3.51427	-5.8339	-9.03941	-8.82217	-8.58154	15.1977	17.2621	15.5671	20.5322	-10.1311	2.5669	13.164	15.6386	15.2048	13.2891	0.71987	-6.62091	-7.46246	7.7039	18.4495	0	0	6.59
17	-2.45184	-4.27467	-4.92362	-3.05757	-10.8596	-3.36512	-5.75935	-8.94524	-8.73161	-8.49513	15.1508	17.0328	15.1533	20.6024	-10.2332	2.2744	12.9239	15.6433	15.262	13.3698	0.72438	-6.61053	-7.38979	7.81791	18.4378	0	0	6.49123
18	-2.47963	-4.27231	-5.02556	-3.14255	-10.9224	-3.2154	-5.68402	-8.85077	-8.64104	-8.40849	15.098	16.794	14.7312	20.6674	-10.3301	1.9797	12.6752	15.6433	15.3158	13.449	0.73312	-6.59805	-7.31639	7.92905	18.4202	0	0	6.38951
19	-2.50651	-4.26852	-5.12479	-3.22626	-10.9803	-3.06514	-5.60793	-8.75597	-8.54997	-8.32159	15.0394	16.5457	14.3011	20.7273	-10.4219	1.6831	12.4178	15.6386	15.366	13.5265	0.74472	-6.58351	-7.24226	8.03752	18.3966	0	0	6.28485
20	-2.53245	-4.26332	-5.2213	-3.30868	-11.0332	-2.91437	-5.5311	-8.66083	-8.4586	-8.23443	14.9749	16.288	13.8635	20.7818	-10.5087	1.3847	12.1519	15.629	15.4126	13.6022	0.76231	-6.56697	-7.16738	8.14347	18.3669	0	0	6.17727
21	-2.55747	-4.25671	-5.31508	-3.38978	-11.0812	-2.76311	-5.45354	-8.56531	-8.36692	-8.147	14.9047	16.0211	13.4186	20.8309	-10.5906	1.0849	11.8772	15.6145	15.4556	13.6763	0.78501	-6.54847	-7.09175	8.24702	18.3309	0	0	6.06679
22	-2.58154	-4.2487	-5.4061	-3.46953	-11.1246	-2.6114	-5.37527	-8.46939	-8.27492	-8.05932	14.8286	15.745	12.9667	20.8745	-10.6675	0.784	11.5939	15.595	15.4947	13.7485	0.81328	-6.52805	-7.01536	8.3483	18.2886	0	0	5.95343
23	-2.60468	-4.23931	-5.49437	-3.54791	-11.1634	-2.45925	-5.2963	-8.37307	-8.18257	-7.97142	14.7467	15.4599	12.5083	20.9124	-10.7397	0.4822	11.302	15.5704	15.53	13.819	0.84762	-6.50578	-6.93823	8.44741	18.2397	0	0	5.83722
24	-2.62686	-4.22854	-5.57988	-3.62489	-11.1979	-2.30669	-5.21665	-8.27626	-8.0899	-7.88336	14.659	15.1659	12.0436	20.9446	-10.8071	0.18	11.0016	15.5407	15.5613	13.8875	0.8887	-6.48168	-6.86036	8.54445	18.1842	0	0	5.71818
25	-2.6481	-4.21644	-5.66262	-3.70044	-11.2279	-2.15374	-5.13632	-8.17899	-7.99693	-7.79523	14.5655	14.8633	11.573	20.971	-10.8698	-0.1224	10.6926	15.5058	15.5886	13.9542	0.93728	-6.45581	-6.78176	8.63951	18.122	0	0	5.59634
26	-2.66837	-4.20298	-5.7426	-3.77455	-11.2538	-2.00045	-5.05534	-8.08124	-7.90371	-7.70715	14.4662	14.5521	11.097	20.9914	-10.928	-0.4246	10.3751	15.4656	15.6117	14.0188	0.99431	-6.42821	-6.70244	8.73265	18.0529	0	0	5.47174
27	-2.68769	-4.18819	-5.81981	-3.84719	-11.2756	-1.84682	-4.97372	-7.98305	-7.81035	-7.61933	14.3612	14.2327	10.6159	21.0057	-10.9817	-0.7264	10.0493	15.42	15.6305	14.0815	1.06093	-6.39892	-6.62243	8.82396	17.9768	0	0	5.34441

## Sheet: Clav-Scap
Joint angle	biceps brevis	biceps longus	clavodeltoideus	spinodeltoideus	acromiodeltoideus	latissiumus dorsi part 1	latissiumus dorsi part 2	latissiumus dorsi part 3	latissiumus dorsi part 4	pectoralis part 1	pectoralis part 2	pectoralis part 3	subcoracoideus	supracoracoideus
-15	0	-4.22988	-14.8707	0	0	25.1302	35.5644	42.697	0	-14.6019	-0.73018	9.2066	2.34352	-6.96827
-14	0	-4.13359	-14.8158	0	0	25.4694	35.8921	42.8815	0	-14.5839	-0.9079	9.05006	2.46056	-6.90455
-13	0	-4.03558	-14.7596	0	0	25.8056	36.215	43.0551	0	-14.5622	-1.08498	8.88897	2.5785	-6.83855
-12	0	-3.93588	-14.7023	0	0	26.1387	36.5328	43.211	0	-14.537	-1.26129	8.72334	2.69732	-6.77035
-11	0	-3.83456	-14.6437	0	0	26.4688	36.8456	43.3547	0	-14.5084	-1.43671	8.55319	2.81697	-6.69998
-10	0	-3.73164	-14.584	0	0	26.7956	37.1531	43.4868	0	-14.4765	-1.61112	8.37856	2.93742	-6.6275
-9	0	-3.62641	-14.5231	0	0	27.1194	37.4553	43.6071	0	-14.4414	-1.7844	8.1995	3.05799	-6.55158
-8	0	-3.51828	-14.461	0	0	27.4399	37.752	43.7154	0	-14.4032	-1.95644	8.01603	3.17784	-6.47096
-7	0	-3.40747	-14.3978	0	0	27.7572	38.0431	43.8116	0	-14.3621	-2.12712	7.8282	3.29672	-6.38583
-6	0	-3.29422	-14.3334	0	0	28.0712	38.3283	43.8954	0	-14.3181	-2.29633	7.63608	3.41439	-6.29639
-5	0	-3.17878	-14.268	0	0	28.3818	38.6076	43.9666	0	-14.2712	-2.46397	7.43971	3.53063	-6.20283
-4	0	-3.06463	-14.2013	0	0	28.6891	38.8808	44.025	0	-14.2217	-2.62993	7.23916	3.64911	-6.11188
-3	0	-2.95463	-14.1336	0	0	28.993	39.1477	44.0733	0	-14.1696	-2.79411	7.0345	3.7743	-6.02978
-2	0	-2.84804	-14.0648	0	0	29.2934	39.4082	44.1078	0	-14.1149	-2.95641	6.82579	3.90693	-5.95592
-1	0	-2.74413	-13.9948	0	0	29.5904	39.662	44.1268	0	-14.0577	-3.11675	6.61312	4.04787	-5.88953
0	0	-2.6421	-13.9238	0	0	29.8838	39.909	44.1308	0	-13.9981	-3.27502	6.39657	4.19792	-5.8302
1	0	-2.53121	-13.8516	0	0	30.1736	40.149	44.12	0	-13.9362	-3.43114	6.17624	4.34041	-5.75432
2	0	-2.40325	-13.7784	0	0	30.4598	40.3817	44.0946	0	-13.872	-3.58504	5.9522	4.45587	-5.64046
3	0	-2.26136	-13.7041	0	0	30.7423	40.607	44.0545	0	-13.8056	-3.73662	5.72458	4.54108	-5.49125
4	0	-2.10865	-13.6287	0	0	31.0211	40.8246	43.9998	0	-13.737	-3.88582	5.49347	4.59278	-5.30956
5	0	-1.9482	-13.5523	0	0	31.2961	41.0342	43.9303	0	-13.6663	-4.03257	5.25898	4.60784	-5.09759
6	0	-1.79406	-13.4748	0	0	31.5672	41.2357	43.8461	0	-13.5936	-4.17679	5.02123	4.61253	-4.88846
7	0	-1.65656	-13.3963	0	0	31.8345	41.4287	43.747	0	-13.5188	-4.31844	4.78035	4.637	-4.71222
8	0	-1.53321	-13.3167	0	0	32.0978	41.613	43.633	0	-13.4421	-4.45743	4.53646	4.68388	-4.56688
9	0	-1.42156	-13.2361	0	0	32.3571	41.7883	43.5039	0	-13.3635	-4.59374	4.28969	4.75569	-4.45041
10	0	-1.31922	-13.1545	0	0	32.6123	41.9543	43.3597	0	-13.283	-4.72729	4.04018	4.85494	-4.36082
11	0	-1.22223	-13.0719	0	0	32.8634	42.1107	43.2002	0	-13.2006	-4.85805	3.78807	4.97755	-4.29051
12	0	-1.12732	-12.9882	0	0	33.1103	42.2571	43.0254	0	-13.1165	-4.98597	3.53352	5.11873	-4.23243
13	0	-1.03311	-12.9036	0	0	33.3529	42.3931	42.8351	0	-13.0307	-5.11101	3.27666	5.27991	-4.18535
14	0	-0.93815	-12.8179	0	0	33.5912	42.5186	42.6292	0	-12.9431	-5.23314	3.01767	5.46251	-4.14801
15	0	-0.84096	-12.7313	0	0	33.8251	42.6329	42.4076	0	-12.8538	-5.35233	2.75668	5.66801	-4.11904

## Sheet: Humeroradioulnar ABAD
Joint angle	biceps brevis	biceps longus	triceps medialis	triceps laterialis + accessorius	triceps longus superficialis + profundus
-10	-5.94187	-4.50931	5.12116	2.41871	-9.20005
-9.75	-5.991	-4.54229	5.11271	2.4093	-9.21678
-9.5	-6.03983	-4.57511	5.10414	2.39983	-9.23328
-9.25	-6.08832	-4.60777	5.09543	2.39031	-9.24954
-9	-6.13651	-4.64027	5.08659	2.38074	-9.26558
-8.75	-6.18437	-4.6726	5.07761	2.37111	-9.28138
-8.5	-6.23192	-4.70476	5.06851	2.36142	-9.29695
-8.25	-6.27914	-4.73676	5.05927	2.35168	-9.3123
-8	-6.32604	-4.7686	5.0499	2.34189	-9.32741
-7.75	-6.37262	-4.80026	5.04039	2.33205	-9.3423
-7.5	-6.41887	-4.83176	5.03075	2.32215	-9.35695
-7.25	-6.46479	-4.86308	5.02098	2.31219	-9.37139
-7	-6.51039	-4.89423	5.01107	2.30219	-9.38559
-6.75	-6.55566	-4.92521	5.00103	2.29213	-9.39956
-6.5	-6.6006	-4.95602	4.99085	2.28202	-9.41331
-6.25	-6.64521	-4.98665	4.98054	2.27185	-9.42683
-6	-6.6895	-5.01711	4.97009	2.26163	-9.44013
-5.75	-6.73344	-5.04739	4.95951	2.25136	-9.4532
-5.5	-6.77706	-5.07749	4.94879	2.24104	-9.46605
-5.25	-6.82036	-5.10741	4.93793	2.23067	-9.47868
-5	-6.86331	-5.13716	4.92694	2.22024	-9.49108
-4.75	-6.90593	-5.16673	4.91581	2.20976	-9.50325
-4.5	-6.94821	-5.19611	4.90454	2.19924	-9.51521
-4.25	-6.99018	-5.22531	4.89314	2.18866	-9.52694
-4	-7.03178	-5.25434	4.88159	2.17802	-9.53846
-3.75	-7.07306	-5.28317	4.86991	2.16734	-9.54975
-3.5	-7.11401	-5.31183	4.85809	2.15661	-9.56082
-3.25	-7.15462	-5.3403	4.84613	2.14583	-9.57167
-3	-7.1949	-5.36858	4.83404	2.13499	-9.58231
-2.75	-7.23482	-5.39668	4.8218	2.12411	-9.59272
-2.5	-7.27442	-5.42459	4.80942	2.11318	-9.60292
-2.25	-7.31371	-5.45232	4.79691	2.1022	-9.6129
-2	-7.35262	-5.47985	4.78425	2.09116	-9.62266
-1.75	-7.39121	-5.5072	4.77145	2.08008	-9.63221
-1.5	-7.42946	-5.53436	4.75852	2.06895	-9.64154
-1.25	-7.46738	-5.56133	4.74544	2.05777	-9.65065
-1	-7.50496	-5.58811	4.73222	2.04655	-9.65955
-0.75	-7.5422	-5.6147	4.71886	2.03527	-9.66824
-0.5	-7.5791	-5.64109	4.70536	2.02395	-9.67671
-0.25	-7.61565	-5.6673	4.69172	2.01258	-9.68497
0	-7.6519	-5.69331	4.67793	2.00116	-9.69302
0.25	-7.68779	-5.71913	4.66401	1.98969	-9.70086
0.5	-7.72333	-5.74476	4.64994	1.97818	-9.70848
0.75	-7.75855	-5.77019	4.63573	1.96662	-9.71589
1	-7.79343	-5.79542	4.62138	1.95501	-9.7231
1.25	-7.82799	-5.82047	4.60688	1.94336	-9.73009
1.5	-7.86219	-5.84532	4.59224	1.93166	-9.73688
1.75	-7.89606	-5.86997	4.57746	1.91991	-9.74346
2	-7.9296	-5.89442	4.56254	1.90812	-9.74983
2.25	-7.9628	-5.91868	4.54747	1.89628	-9.75599
2.5	-7.99567	-5.94275	4.53226	1.8844	-9.76195
2.75	-8.02821	-5.96661	4.51691	1.87248	-9.7677
3	-8.06041	-5.99028	4.50141	1.86051	-9.77324
3.25	-8.09227	-6.01375	4.48577	1.84849	-9.77859
3.5	-8.12381	-6.03703	4.46998	1.83643	-9.78372
3.75	-8.15501	-6.0601	4.45405	1.82432	-9.78866
4	-8.18588	-6.08298	4.43798	1.81218	-9.79339
4.25	-8.21642	-6.10566	4.42176	1.79998	-9.79792
4.5	-8.24663	-6.12814	4.4054	1.78775	-9.80225
4.75	-8.2765	-6.15042	4.3889	1.77547	-9.80637
5	-8.30605	-6.1725	4.37225	1.76315	-9.8103
5.25	-8.33527	-6.19438	4.35545	1.75079	-9.81403
5.5	-8.36416	-6.21606	4.33851	1.73838	-9.81755
5.75	-8.39272	-6.23754	4.32143	1.72594	-9.82088
6	-8.42095	-6.25882	4.3042	1.71345	-9.82401
6.25	-8.44886	-6.2799	4.28683	1.70092	-9.82695
6.5	-8.47644	-6.30078	4.26931	1.68835	-9.82968
6.75	-8.50371	-6.32147	4.25165	1.67574	-9.83222
7	-8.53062	-6.34194	4.23385	1.66308	-9.83457
7.25	-8.55723	-6.36222	4.2159	1.65039	-9.83672
7.5	-8.58351	-6.3823	4.1978	1.63766	-9.83868
7.75	-8.60947	-6.40218	4.17957	1.62489	-9.84044
8	-8.63511	-6.42186	4.16118	1.61208	-9.84201
8.25	-8.66043	-6.44133	4.14265	1.59923	-9.84339
8.5	-8.68545	-6.46061	4.12398	1.58634	-9.84457
8.75	-8.71013	-6.47968	4.10517	1.57341	-9.84557
9	-8.73449	-6.49855	4.08621	1.56044	-9.84637
9.25	-8.75853	-6.51722	4.0671	1.54744	-9.84699
9.5	-8.78225	-6.53569	4.04785	1.5344	-9.84741
9.75	-8.80566	-6.55396	4.02846	1.52132	-9.84765
10	-8.82876	-6.57203	4.00893	1.5082	-9.8477

## Sheet: Humeroradioulnar FE
Joint angle	biceps brevis	biceps longus	triceps medialis	triceps laterialis + accessorius	triceps longus superficialis + profundus
-57	-8.3756	-15.8347	5.97257	6.44827	8.20522
-55	-10.868	-16.5053	6.15116	6.61473	8.45544
-53	-13.0762	-17.098	6.31284	6.74078	8.69998
-51	-14.9904	-17.6183	6.45615	6.8322	8.93857
-49	-16.6249	-18.0718	6.58202	6.89602	9.17098
-47	-18.0061	-18.4645	6.6888	6.93674	9.39693
-45	-19.1649	-18.8016	6.77337	6.96281	9.61616
-43	-20.1322	-19.0881	6.84364	7.01794	9.82841
-41	-20.9364	-19.3283	6.90137	7.28552	10.0334
-39	-21.6023	-19.5262	6.94699	7.54938	10.2308
-37	-22.1511	-19.6854	6.98102	7.80934	10.4204
-35	-22.6004	-19.809	7.00401	8.06524	10.6018
-33	-22.965	-19.8998	7.0165	8.31688	10.7748
-31	-23.257	-19.9603	7.0189	8.56407	10.939
-29	-23.4864	-19.9928	7.13575	8.80663	11.094
-27	-23.6614	-19.9992	7.27263	9.04434	11.2396
-25	-23.7888	-19.9814	7.40582	9.27702	11.3754
-23	-23.8742	-19.9408	7.53519	9.50443	11.501
-21	-23.9223	-19.8789	7.66057	9.72637	11.6161
-19	-23.9369	-19.7971	7.7818	9.94261	11.7202
-17	-23.9213	-19.6963	7.89872	10.1529	11.813
-15	-23.8783	-19.5777	8.01113	10.357	11.894
-13	-23.8101	-19.4423	8.11884	10.5547	11.9629
-11	-23.7187	-19.2907	8.22163	10.7457	12.0192
-9	-23.6058	-19.1239	8.31929	10.9297	12.0624
-7	-23.4729	-18.9425	8.41157	11.1064	12.0921
-5	-23.3211	-18.7471	8.49821	11.2756	12.1078
-3	-23.1516	-18.5384	8.57892	11.4368	12.109
-1	-22.9654	-18.3169	8.6534	11.5899	12.0953
1	-22.7632	-18.0831	8.72132	11.7344	12.0661
3	-22.5458	-17.8375	8.78232	11.8699	12.021
5	-22.3138	-17.5806	8.83599	11.9961	11.9593
7	-22.068	-17.3128	8.88192	12.1125	11.8807
9	-21.8088	-17.0345	8.91962	12.2188	11.7845
11	-21.5367	-16.7461	8.94857	12.3144	11.6702
13	-21.2522	-16.448	8.96821	12.3988	11.5375
15	-20.9558	-16.1405	8.9779	12.4716	11.3856
17	-20.6479	-15.8241	8.97695	12.5322	11.2142
19	-20.3287	-15.499	8.96461	12.58	11.0228
21	-19.9988	-15.1656	8.94002	12.6144	10.811
23	-19.6585	-14.8242	8.90226	12.6347	10.5784
25	-19.3081	-14.4751	8.85031	12.6403	10.3245
27	-18.9479	-14.1186	8.78304	12.6303	10.0492
29	-18.5782	-13.755	8.69922	12.6041	9.75208
31	-18.1995	-13.3846	8.59751	12.5607	9.43309
33	-17.8119	-13.0076	8.47641	12.4994	9.09212
35	-17.4158	-12.6245	8.33435	12.4191	8.72916
37	-17.0116	-12.2355	8.1696	12.319	8.34433
39	-16.5995	-11.8409	7.98032	12.1981	7.93786
41	-16.1798	-11.441	7.76457	12.0552	7.51009
43	-15.7527	-11.036	7.52035	11.8894	7.06153
45	-15.3188	-10.6262	7.24562	11.6995	6.59278
47	-14.8781	-10.2121	6.93835	11.4844	6.10465
49	-14.4312	-9.7937	6.59661	11.243	5.59806
51	-13.9783	-9.3715	6.21868	10.9742	5.0741
53	-13.5196	-8.9456	5.80315	10.6769	4.53403
55	-13.0556	-8.5164	5.34908	10.35	3.97926
57	-12.5865	-8.0842	4.85616	9.99273	3.41132

## Sheet: Humeroradioulnar LAR
Joint angle	biceps brevis	biceps longus	triceps medialis	triceps laterialis + accessorius	triceps longus superficialis + profundus
-10	-0.008808	-1.56398	-1.65674	0.44212	-1.45663
-9.75	-0.018797	-1.54985	-1.65245	0.45618	-1.44737
-9.5	-0.028787	-1.53571	-1.64813	0.47024	-1.43808
-9.25	-0.038776	-1.52154	-1.64378	0.48429	-1.42877
-9	-0.048764	-1.50736	-1.63941	0.49833	-1.41945
-8.75	-0.058752	-1.49316	-1.63502	0.51237	-1.41009
-8.5	-0.068739	-1.47893	-1.6306	0.5264	-1.40072
-8.25	-0.078725	-1.46469	-1.62615	0.54042	-1.39132
-8	-0.088709	-1.45043	-1.62168	0.55443	-1.3819
-7.75	-0.098691	-1.43615	-1.61718	0.56844	-1.37246
-7.5	-0.108671	-1.42185	-1.61266	0.58244	-1.363
-7.25	-0.118649	-1.40753	-1.60812	0.59643	-1.35352
-7	-0.128625	-1.3932	-1.60355	0.61042	-1.34401
-6.75	-0.138598	-1.37884	-1.59895	0.62439	-1.33449
-6.5	-0.148569	-1.36447	-1.59433	0.63836	-1.32494
-6.25	-0.158536	-1.35008	-1.58969	0.65232	-1.31538
-6	-0.1685	-1.33568	-1.58502	0.66627	-1.30579
-5.75	-0.17846	-1.32125	-1.58033	0.68021	-1.29618
-5.5	-0.188416	-1.30681	-1.57562	0.69415	-1.28655
-5.25	-0.198369	-1.29236	-1.57088	0.70807	-1.27691
-5	-0.208316	-1.27788	-1.56611	0.72198	-1.26724
-4.75	-0.21826	-1.26339	-1.56133	0.73589	-1.25755
-4.5	-0.228199	-1.24889	-1.55652	0.74978	-1.24784
-4.25	-0.238132	-1.23436	-1.55168	0.76366	-1.23812
-4	-0.248061	-1.21983	-1.54683	0.77754	-1.22837
-3.75	-0.257984	-1.20527	-1.54195	0.7914	-1.2186
-3.5	-0.267901	-1.1907	-1.53704	0.80525	-1.20882
-3.25	-0.277812	-1.17612	-1.53212	0.81909	-1.19902
-3	-0.287717	-1.16152	-1.52717	0.83292	-1.18919
-2.75	-0.297616	-1.14691	-1.52219	0.84674	-1.17935
-2.5	-0.307507	-1.13228	-1.5172	0.86055	-1.16949
-2.25	-0.317393	-1.11763	-1.51218	0.87435	-1.15962
-2	-0.32727	-1.10298	-1.50714	0.88813	-1.14972
-1.75	-0.33714	-1.08831	-1.50208	0.90191	-1.13981
-1.5	-0.347003	-1.07362	-1.49699	0.91567	-1.12988
-1.25	-0.356858	-1.05892	-1.49189	0.92941	-1.11993
-1	-0.366705	-1.04421	-1.48676	0.94315	-1.10997
-0.75	-0.376544	-1.02949	-1.48161	0.95687	-1.09998
-0.5	-0.386374	-1.01475	-1.47643	0.97058	-1.08998
-0.25	-0.396196	-1	-1.47124	0.98428	-1.07997
0	-0.406008	-0.98523	-1.46602	0.99796	-1.06994
0.25	-0.415812	-0.97046	-1.46078	1.01163	-1.05988
0.5	-0.425606	-0.95567	-1.45552	1.02529	-1.04982
0.75	-0.43539	-0.94087	-1.45024	1.03893	-1.03974
1	-0.445164	-0.92606	-1.44493	1.05256	-1.02964
1.25	-0.454928	-0.91123	-1.43961	1.06618	-1.01952
1.5	-0.464682	-0.8964	-1.43426	1.07977	-1.00939
1.75	-0.474425	-0.88155	-1.4289	1.09336	-0.999246
2	-0.484158	-0.8667	-1.42351	1.10693	-0.989085
2.25	-0.493878	-0.85183	-1.4181	1.12049	-0.978908
2.5	-0.503588	-0.83695	-1.41267	1.13403	-0.968716
2.75	-0.513287	-0.82206	-1.40722	1.14755	-0.95851
3	-0.522974	-0.80716	-1.40175	1.16106	-0.948288
3.25	-0.532648	-0.79225	-1.39626	1.17455	-0.938052
3.5	-0.542311	-0.77733	-1.39075	1.18803	-0.927801
3.75	-0.551961	-0.7624	-1.38522	1.20149	-0.917536
4	-0.561598	-0.74746	-1.37966	1.21494	-0.907257
4.25	-0.571223	-0.73252	-1.37409	1.22837	-0.896964
4.5	-0.580834	-0.71756	-1.3685	1.24178	-0.886657
4.75	-0.590433	-0.70259	-1.36289	1.25518	-0.876336
5	-0.600017	-0.68762	-1.35726	1.26855	-0.866002
5.25	-0.609588	-0.67264	-1.35161	1.28191	-0.855655
5.5	-0.619145	-0.65765	-1.34594	1.29526	-0.845294
5.75	-0.628688	-0.64265	-1.34025	1.30858	-0.834921
6	-0.638216	-0.62764	-1.33454	1.32189	-0.824534
6.25	-0.64773	-0.61263	-1.32881	1.33518	-0.814135
6.5	-0.657228	-0.5976	-1.32306	1.34845	-0.803724
6.75	-0.666712	-0.58257	-1.31729	1.36171	-0.7933
7	-0.67618	-0.56754	-1.31151	1.37494	-0.782864
7.25	-0.685633	-0.55249	-1.3057	1.38816	-0.772415
7.5	-0.69507	-0.53744	-1.29988	1.40135	-0.761955
7.75	-0.704491	-0.52239	-1.29404	1.41453	-0.751484
8	-0.713896	-0.50733	-1.28818	1.42769	-0.741
8.25	-0.723284	-0.49226	-1.2823	1.44083	-0.730506
8.5	-0.732656	-0.47718	-1.2764	1.45395	-0.72
8.75	-0.742011	-0.4621	-1.27049	1.46705	-0.709483
9	-0.751349	-0.44701	-1.26455	1.48012	-0.698955
9.25	-0.76067	-0.43192	-1.2586	1.49318	-0.688416
9.5	-0.769973	-0.41683	-1.25263	1.50622	-0.677867
9.75	-0.779259	-0.40172	-1.24664	1.51924	-0.667308
10	-0.788526	-0.38662	-1.24064	1.53224	-0.656738
10.25	-0.797776	-0.37151	-1.23462	1.54521	-0.646159
10.5	-0.807007	-0.35639	-1.22858	1.55817	-0.635569
10.75	-0.81622	-0.34127	-1.22252	1.5711	-0.62497
11	-0.825414	-0.32615	-1.21644	1.58401	-0.614361
11.25	-0.834588	-0.31102	-1.21035	1.5969	-0.603742
11.5	-0.843744	-0.29589	-1.20424	1.60977	-0.593115
11.75	-0.852881	-0.28076	-1.19812	1.62261	-0.582478
12	-0.861997	-0.26562	-1.19197	1.63543	-0.571832
